# Supplementary material for: Exploring the Quality of Life of People with Incomplete Spinal Cord Injury Who Can Ambulate
Source: Preprints.org preprint supplement (doi:10.20944/preprints202308.1557.v1), 2023-08-23
Supplement: Supplementary file 1 [file supplementary]

Archive with 3 entries (3 files):
- Document S1.pdf
- Table S1.pdf
- Table S2.pdf
