# Supplementary material for: Exploring the Quality of Life of People with Incomplete Spinal Cord Injury Who Can Ambulate
Source: Preprints.org preprint supplement (doi:10.20944/preprints202308.1557.v1), 2023-08-23
Supplement: Supplementary file 1 [file supplementary › Table S1.pdf]

**Table S1:** Consolidated criteria for reporting qualitative research checklist<sup>1</sup>

| Topic                                          | Item No | Guide questions/ Description                                                                                                                     | Reported on Page No. |
|------------------------------------------------|---------|--------------------------------------------------------------------------------------------------------------------------------------------------|----------------------|
| <b>Domain 1: Research team and reflexivity</b> |         |                                                                                                                                                  |                      |
| <i>Personal characteristics</i>                |         |                                                                                                                                                  |                      |
| Interviewer/facilitator                        | 1       | Which author/s conducted the interview or focus group?                                                                                           | 8,9                  |
| Credentials                                    | 2       | What were the researcher's credentials? E.g., PhD, MD                                                                                            | 8                    |
| Occupation                                     | 3       | What was their occupation at the time of the study?                                                                                              | 8                    |
| Gender                                         | 4       | Was the researcher male or female?                                                                                                               | 8                    |
| Experience and training                        | 5       | What experience or training did the researcher have?                                                                                             | 8,9                  |
| <i>Relationship with participants</i>          |         |                                                                                                                                                  |                      |
| Relationship established                       | 6       | Was a relationship established prior to study commencement?                                                                                      | 9                    |
| Participant knowledge of the interviewer       | 7       | What did the participants know about the researcher?<br>e.g., personal goals, reasons for doing the research                                     | 8,9                  |
| Interviewer characteristics                    | 8       | What characteristics were reported about the interviewer/facilitator. Bias, assumptions, reasons, and interests in the research topic            | 10,11                |
| <b>Domain 2: Study design</b>                  |         |                                                                                                                                                  |                      |
| <i>Theoretical framework</i>                   |         |                                                                                                                                                  |                      |
| Methodological orientation and Theory          | 9       | What methodological orientation was stated to underpin the study? e.g., grounded theory, discourse analysis, ethnography, phenomenology, content | 5                    |

|                              |    |                                                                                     |     |
|------------------------------|----|-------------------------------------------------------------------------------------|-----|
|                              |    | analysis                                                                            |     |
| <i>Participant selection</i> |    |                                                                                     |     |
| Sampling                     | 10 | How were participants selected? e.g., purposive, convenience, consecutive, snowball | 6   |
| Method of approach           | 11 | How were participants approached? e.g., face-to-face, telephone, mail, email        | 6,7 |
| Sample size                  | 12 | How many participants were in the study?                                            | 6   |
| Non-participation            | 13 | How many people refused to participate or dropped out? Reasons?                     | 6   |
| <i>Setting</i>               |    |                                                                                     |     |
| Setting of data collection   | 14 | Where was the data collected? e.g., home, clinic, workplace                         | 6,7 |
| Presence of nonparticipants  | 15 | Was anyone else present besides the participants and researchers?                   | 7,9 |
| Description of sample        | 16 | What are the important characteristics of the sample? e.g., demographic data, date  | 6   |
| <i>Data collection</i>       |    |                                                                                     |     |
| Interview guide              | 17 | Were questions, prompts, guides provided by the authors? Was it pilot tested?       | 9   |
| Repeat interviews            | 18 | Were repeat interviews carried out? If yes, how many?                               | 8   |
| Audio/visual recording       | 19 | Did the research use audio or visual recording to collect the data?                 | 6   |
| Field notes                  | 20 | Were field notes made during and/or after the interview or focus group?             | 11  |
| Duration                     | 21 | what was the duration of the inter views or focus group?                            | 9   |

|                                        |    |                                                                                                                                  |                     |
|----------------------------------------|----|----------------------------------------------------------------------------------------------------------------------------------|---------------------|
| Data saturation                        | 22 | Was data saturation discussed?                                                                                                   | 11                  |
| Transcripts returned                   | 23 | Were transcripts returned to participants for comment and/or correction?                                                         | 11                  |
| <b>Domain 3: analysis and findings</b> |    |                                                                                                                                  |                     |
| <i>Data analysis</i>                   |    |                                                                                                                                  |                     |
| Number of data coders                  | 24 | How many data coders coded the data?                                                                                             | 10                  |
| Description of the coding tree         | 25 | Did authors provide a description of the coding tree?                                                                            | 10,17,18            |
| Derivation of themes                   | 26 | Were themes identified in advance or derived from the data?                                                                      | 18-20               |
| Software                               | 27 | What software, if applicable, was used to manage the data?                                                                       | 10                  |
| Participant checking                   | 28 | Did participants provide feedback on the findings?                                                                               | 11                  |
| <i>Reporting</i>                       |    |                                                                                                                                  |                     |
| Quotations presented                   | 29 | Were participant quotations presented to illustrate the themes/findings? Was each quotation identified? e.g., participant number | 22-24; 27-30; 33-35 |
| Data and findings consistent           | 30 | Was there consistency between the data presented and the findings?                                                               | 42-43               |
| Clarity of major themes                | 31 | Were major themes clearly presented in the findings?                                                                             | 21-36               |
| Clarity of minor themes                | 32 | Is there a description of diverse cases or discussion of minor themes?                                                           | 36-42               |

<sup>1</sup> Tong A, Sainsbury P, Craig J. Consolidated criteria for reporting qualitative research (COREQ): a 32-item checklist for interviews and focus groups. *Int J Qual Health Care* 2007;19:349-357.
