# Supplementary material for: Exploring the Quality of Life of People with Incomplete Spinal Cord Injury Who Can Ambulate
Source: Preprints.org preprint supplement (doi:10.20944/preprints202308.1557.v1), 2023-08-23
Supplement: Supplementary file 1 [file supplementary › Table S2.pdf]

**Table S2:** Good reporting of a mixed methods study checklist <sup>1</sup>

| Guidelines                                                                                   | Section: Page                                |
|----------------------------------------------------------------------------------------------|----------------------------------------------|
| Describe the justification for using a mixed-methods approach to the research question       | Methods- under procedures: pg. 5             |
| Describe the design in terms of the purpose, priority, and sequence of methods               | Methods- procedures: pg 5 - 9                |
| Describe each method in terms of sampling, data collection, and analysis                     | Procedures: pg 5 - 9<br>Analysis: pg. 9 - 11 |
| Describe where integration has occurred, how it has occurred, and who has participated in it | Design: pg. 5                                |
| Describe any limitation of one method associated with the presence of the other method       | Discussion pg :36-42                         |
| Describe any insights gained from mixing or integrating methods                              | Discussion: pg: 36-42                        |

<sup>1</sup>O'Cathain A, Murphy E, Nicholl J. The quality of mixed methods studies in health services research. *J Health Serv Res Policy* 2008;13: 92-98.
